# Supplementary material for: Notable-HCC: A phase Ib trial of neoadjuvant tislelizumab with stereotactic body radiotherapy in patients with early stage resectable hepatocellular carcinoma
Source: Research Square preprint supplement (doi:10.21203/rs.3.rs-3823003/v1), 2024-01-09

Patient 01

Baseline

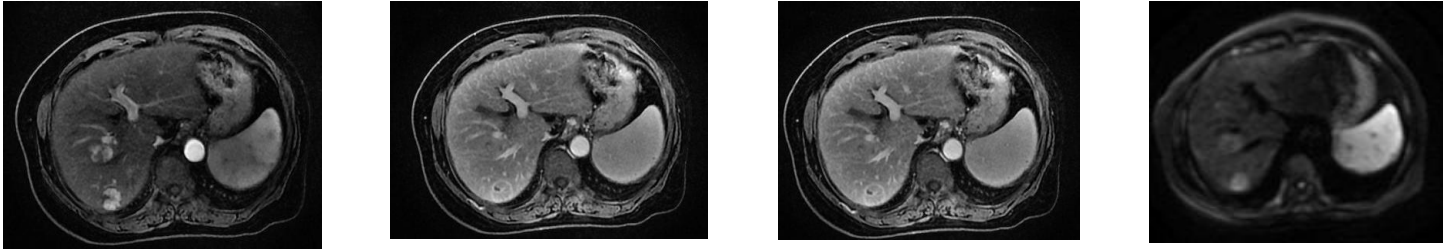

After neoadjuvant

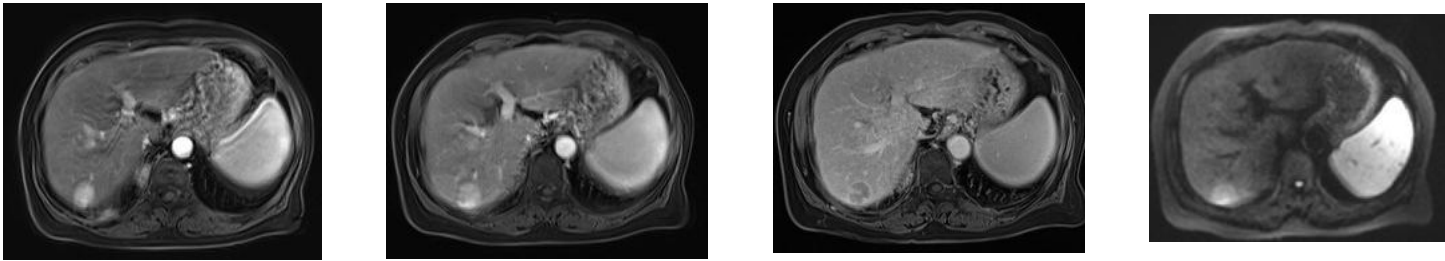

After surgery

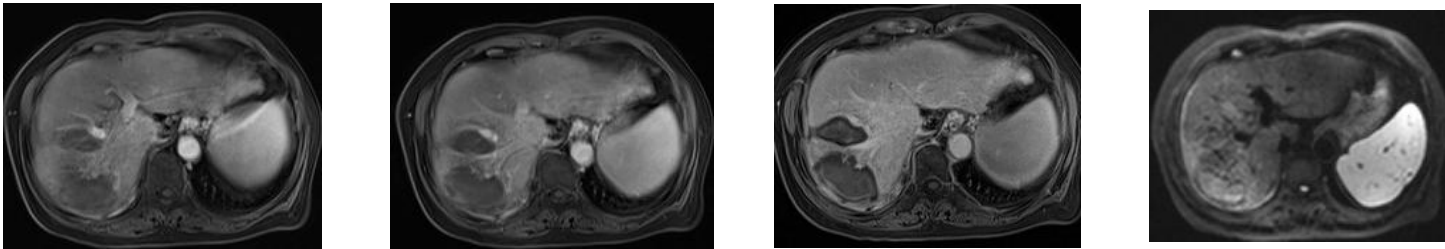

Intraoperative image

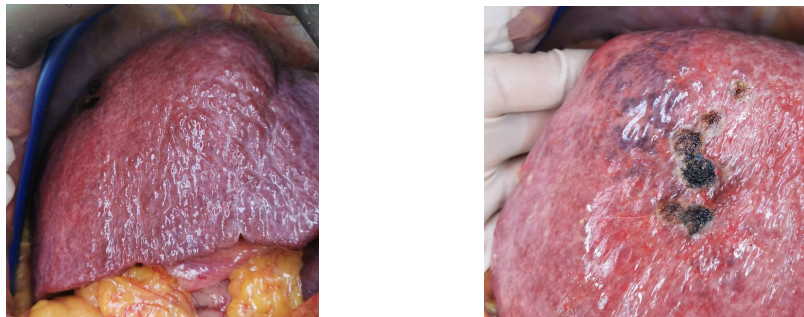

Patient 02

Nodule 1

Baseline

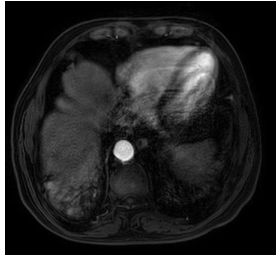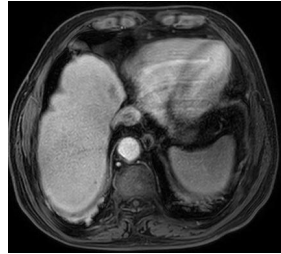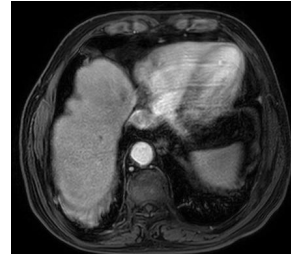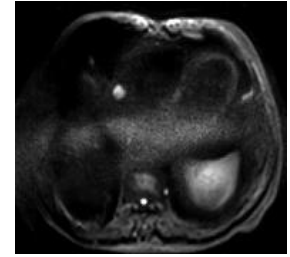

After  
neoadjuvant

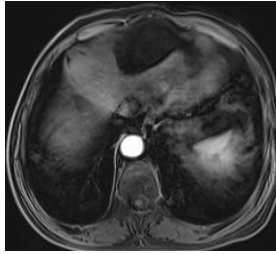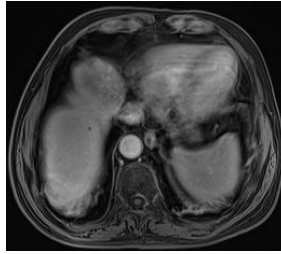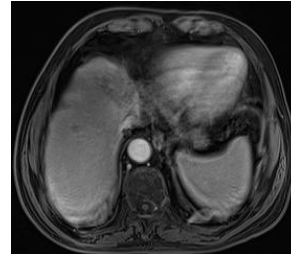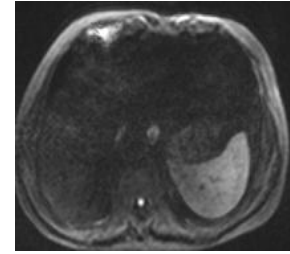

After  
surgery

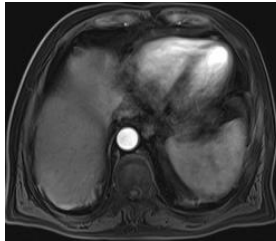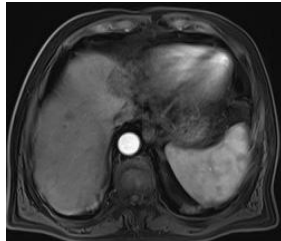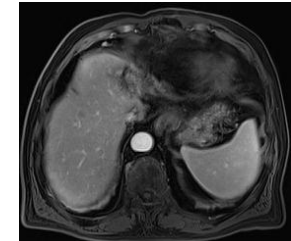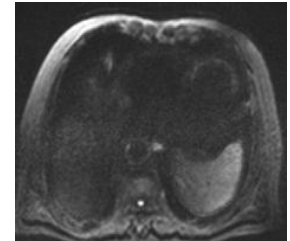

Tumor  
specimen

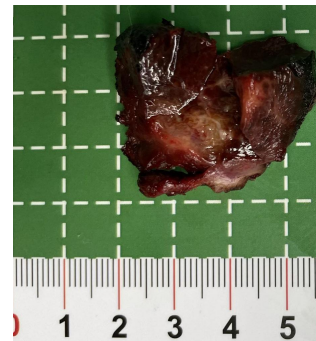

Patient 02

Nodule 2

Baseline

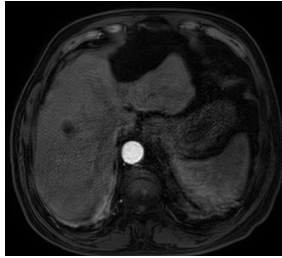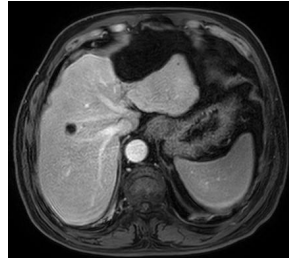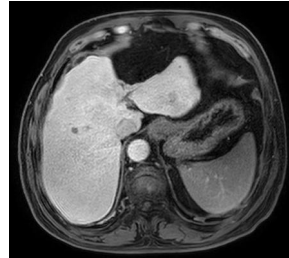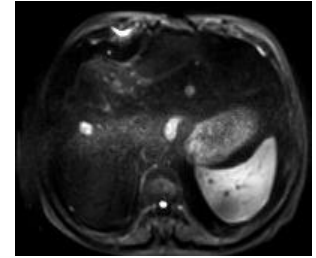

After  
neoadjuvant

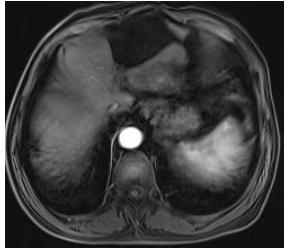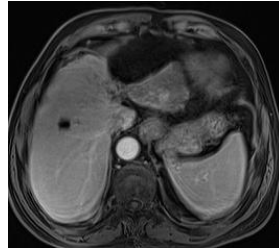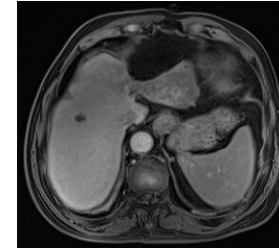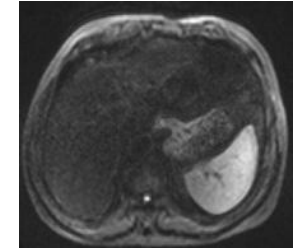

After  
surgery

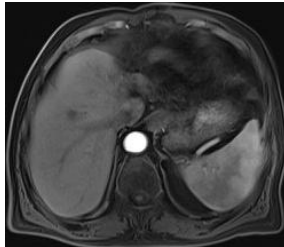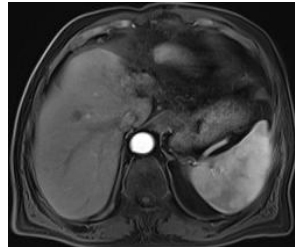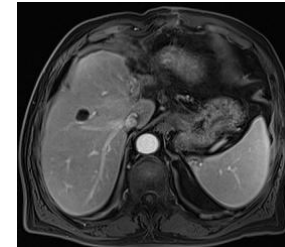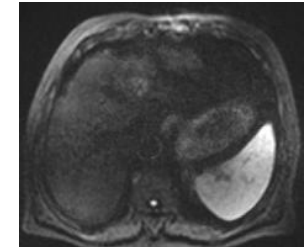

Tumor  
specimen

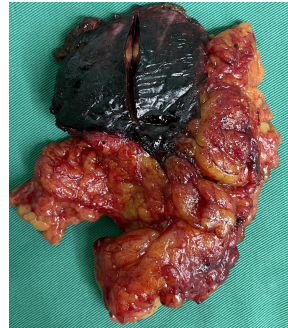



Patient 03

Baseline

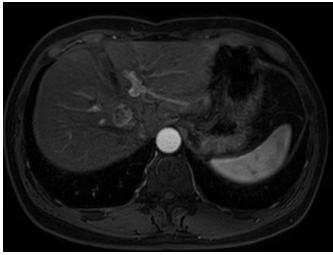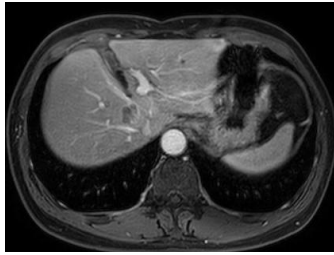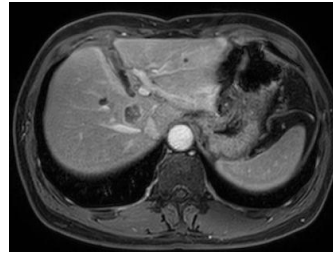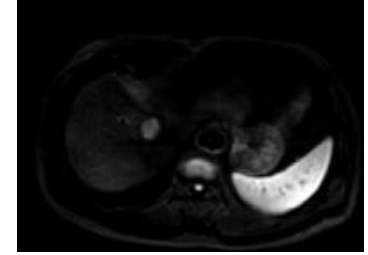

After neoadjuvant

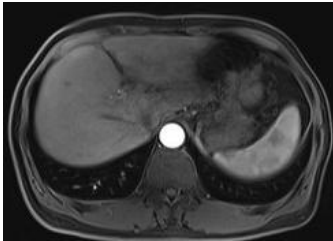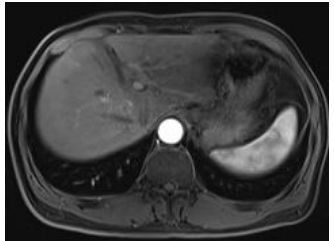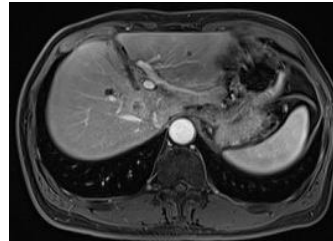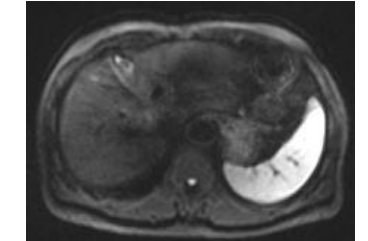

After surgery

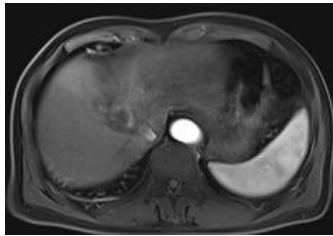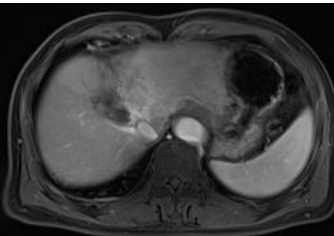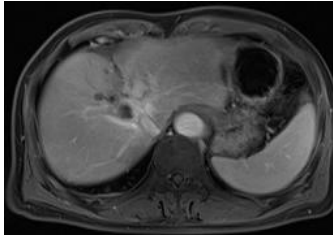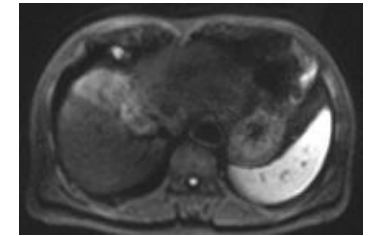

Tumor specimen

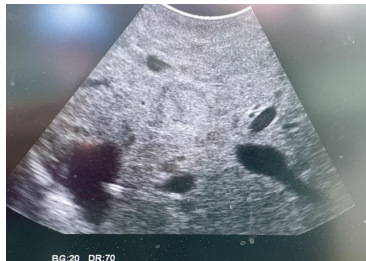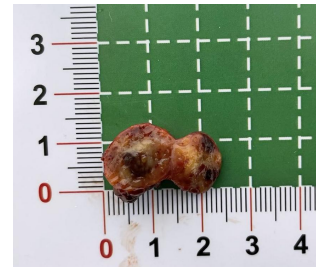



Patient 04

Baseline

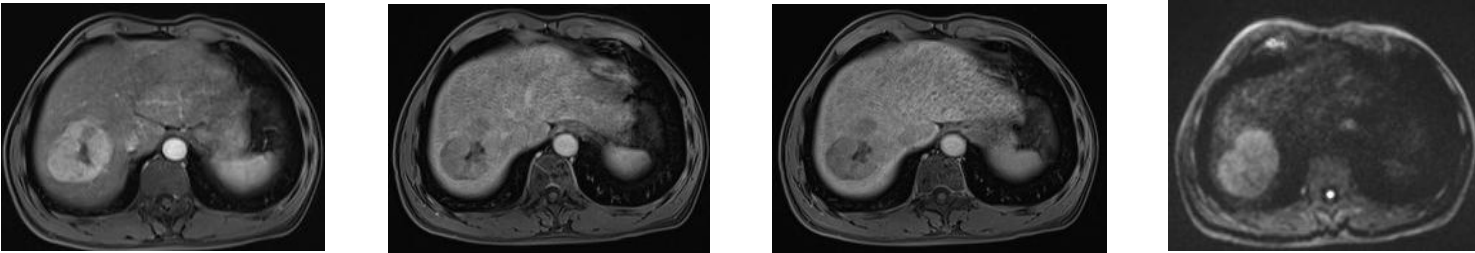

After neoadjuvant

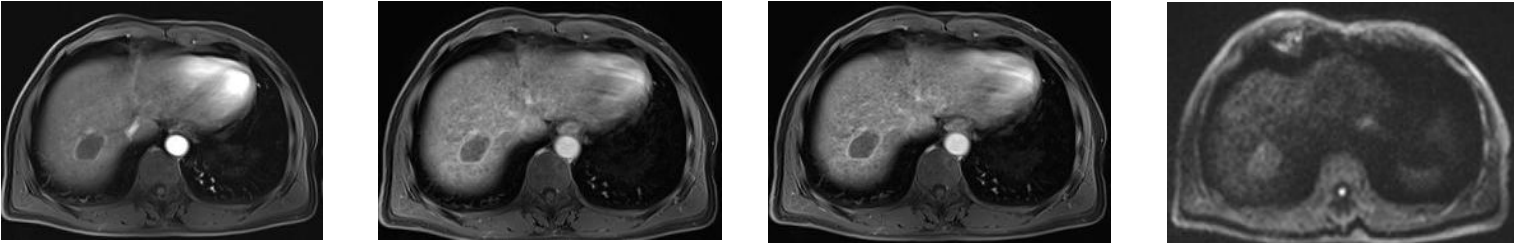

After surgery

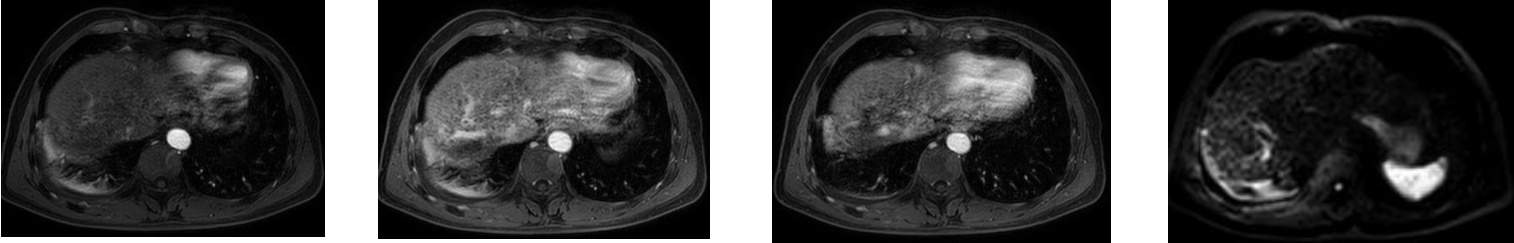

Tumor specimen

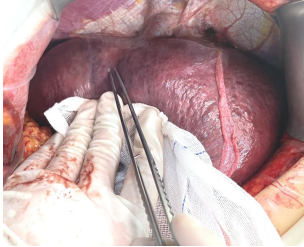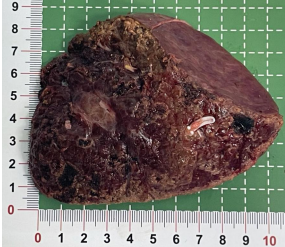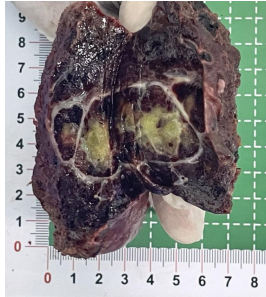

Patient 05

Baseline

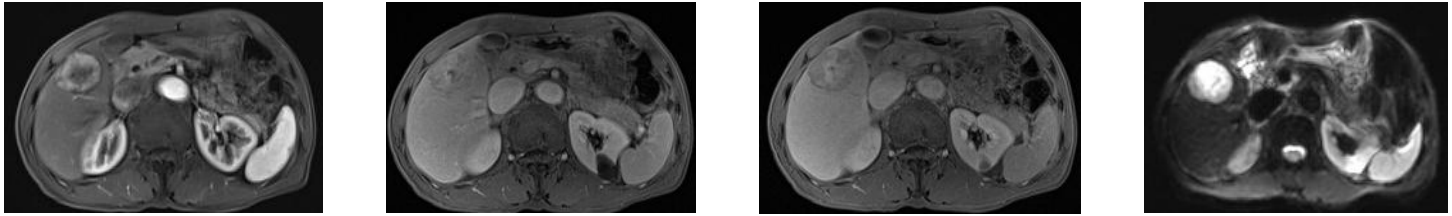

After neoadjuvant

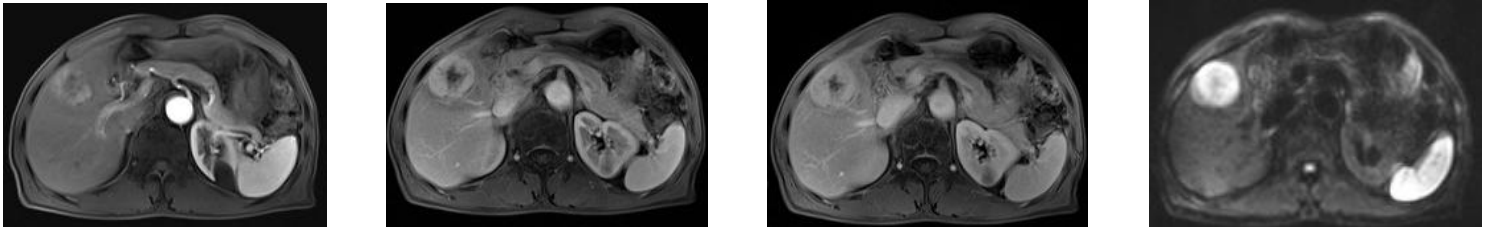

After surgery

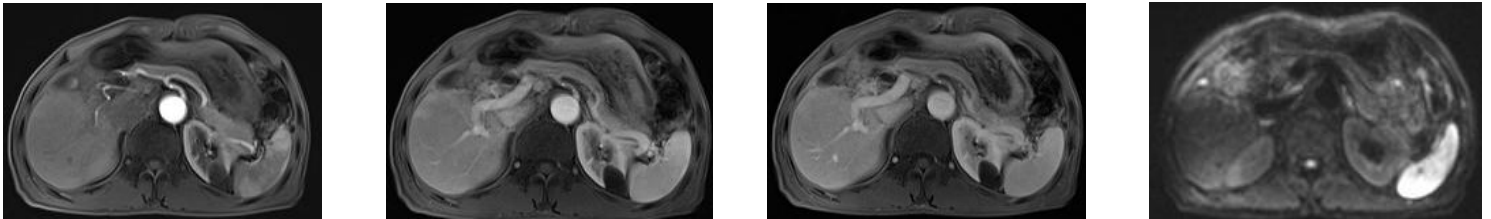

Tumor specimen

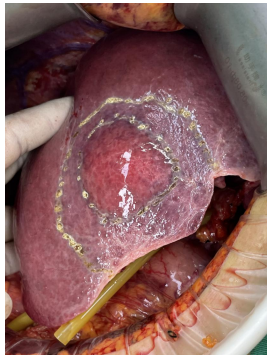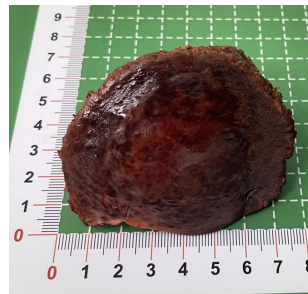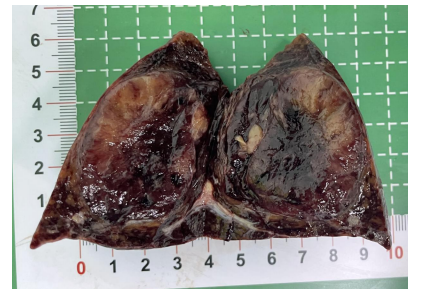

Patient 06

Baseline

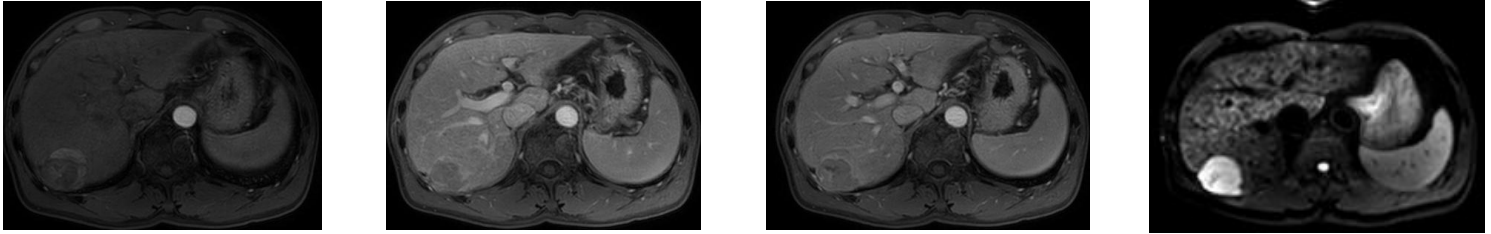

After neoadjuvant

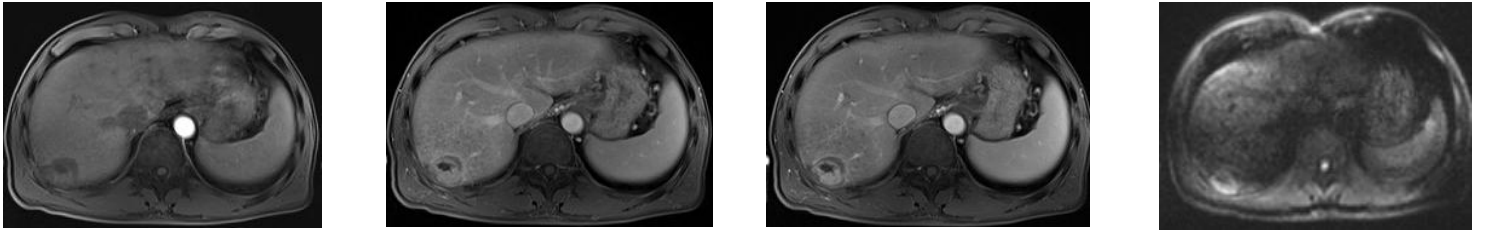

After surgery

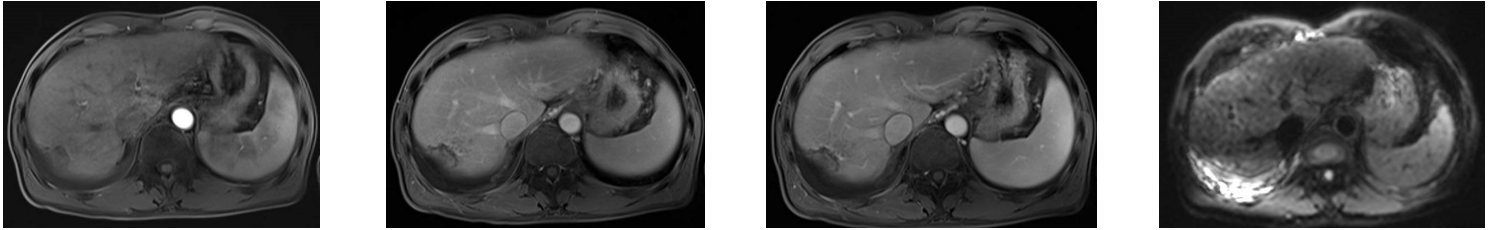

Tumor specimen

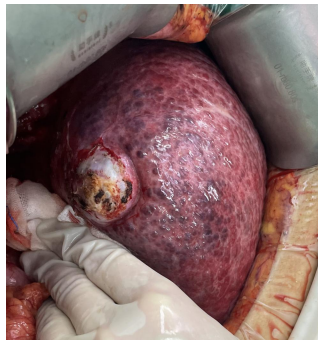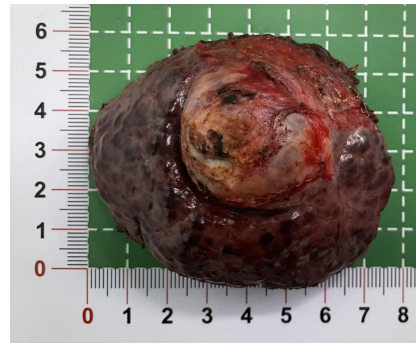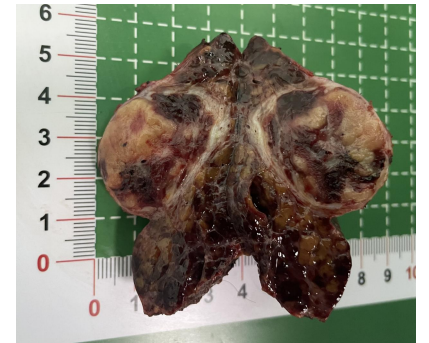



Patient 07

Baseline

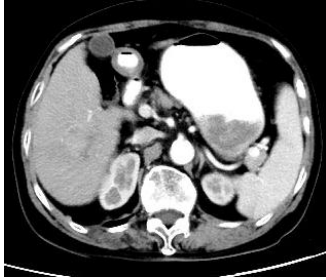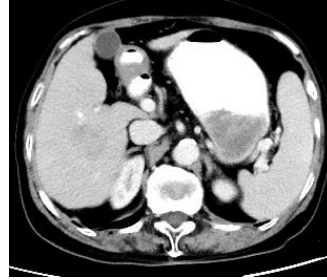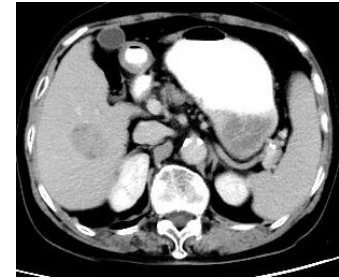

After neoadjuvant

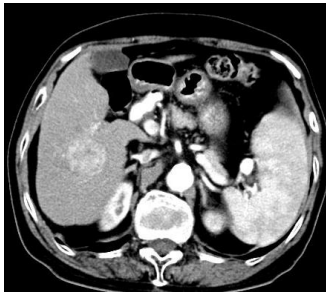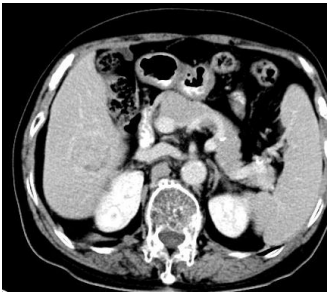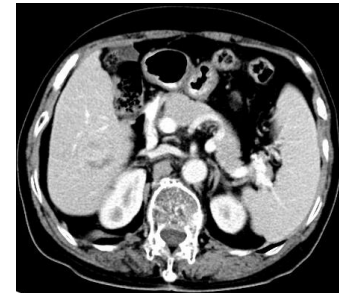

After surgery

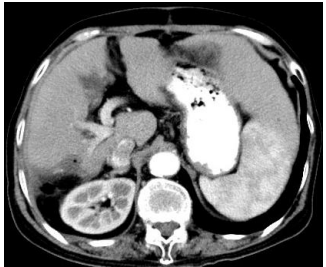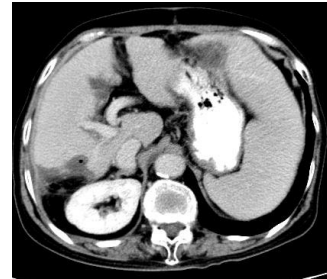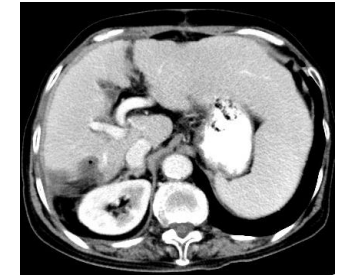

Tumor specimen

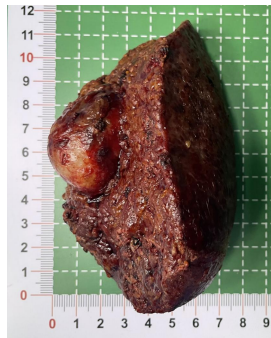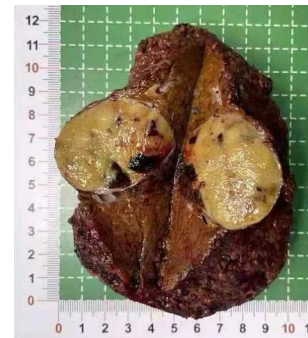

Patient 08

Baseline

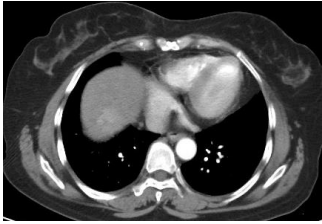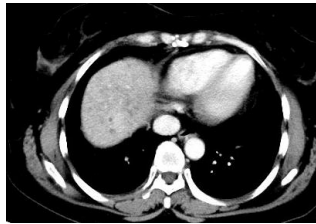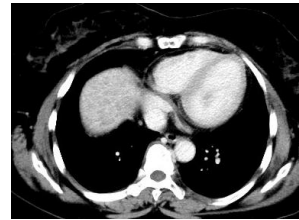

After  
neoadjuvant

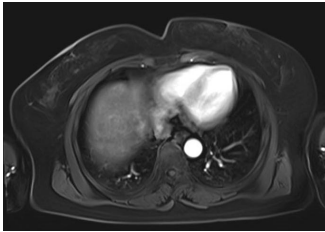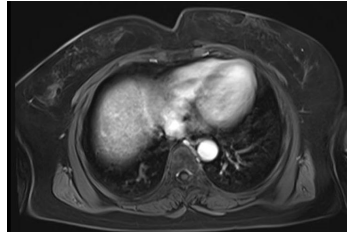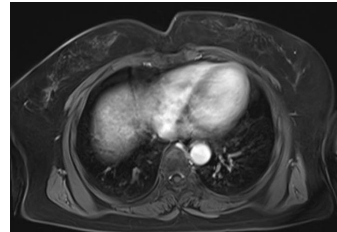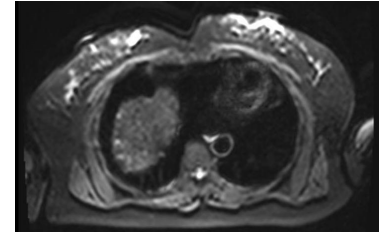

After  
surgery

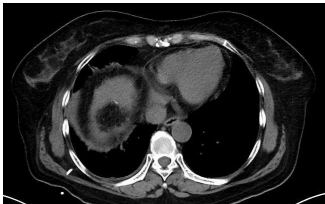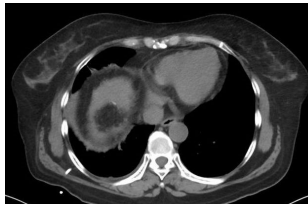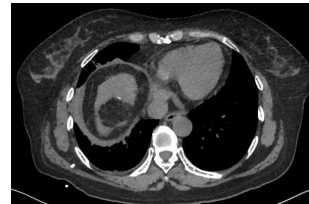

Tumor  
specimen

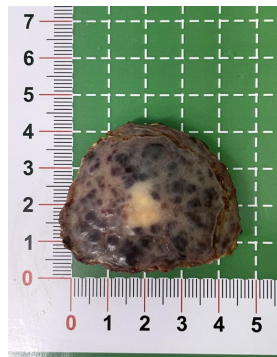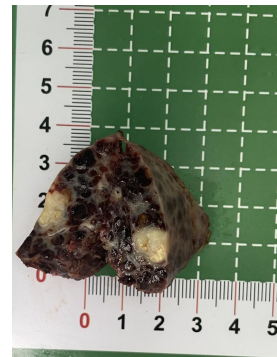

Patient 09

Baseline

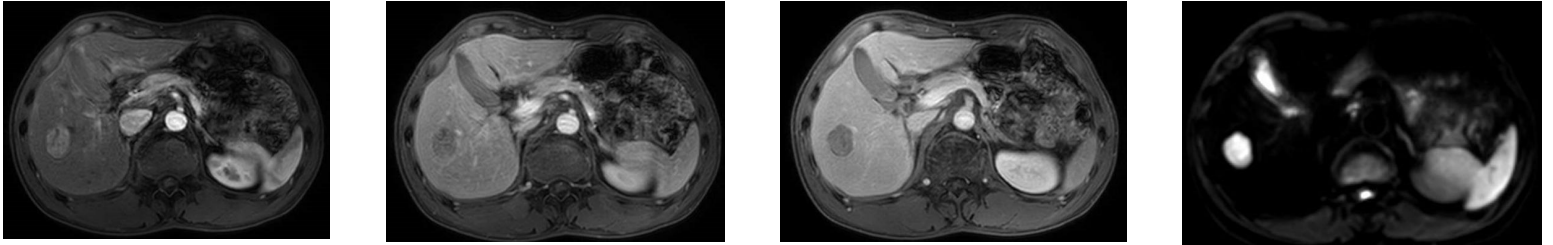

After  
neoadjuvant

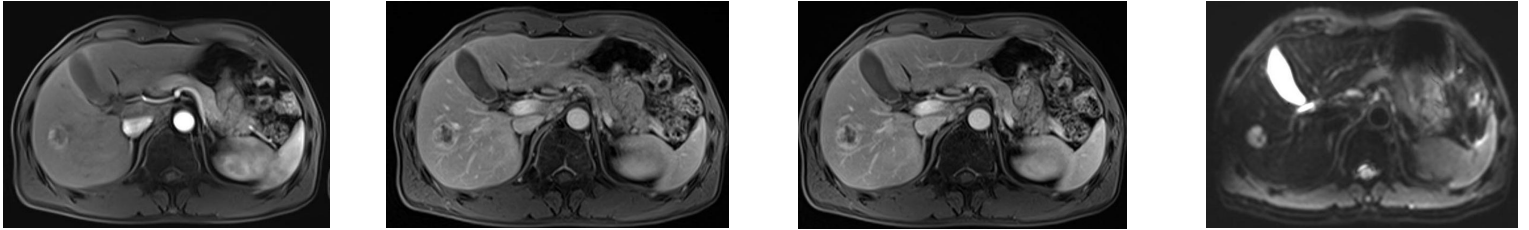

After  
surgery

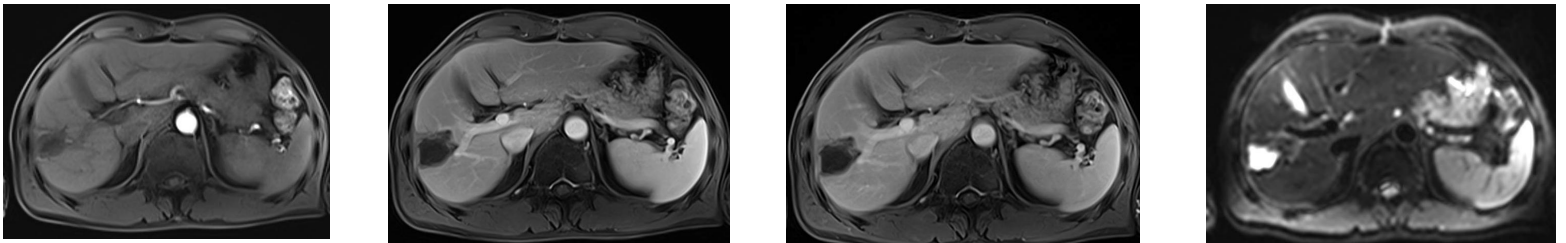

Tumor  
specimen

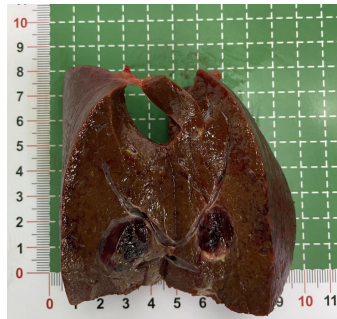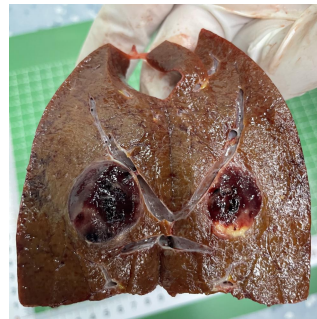



Patient 10

Baseline

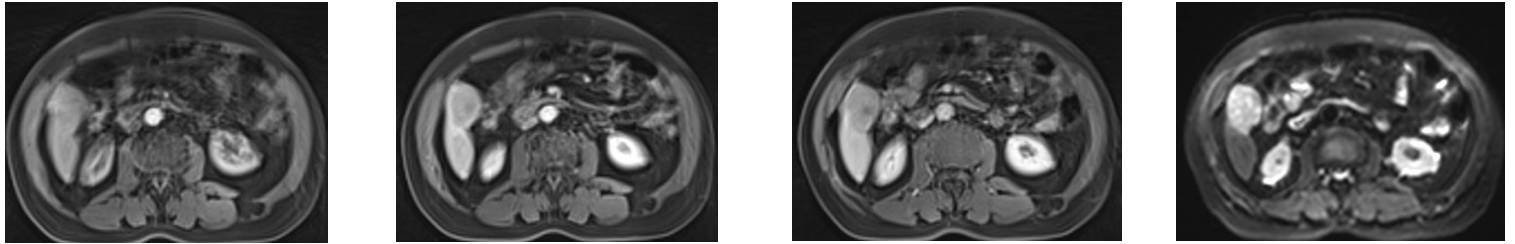

After neoadjuvant

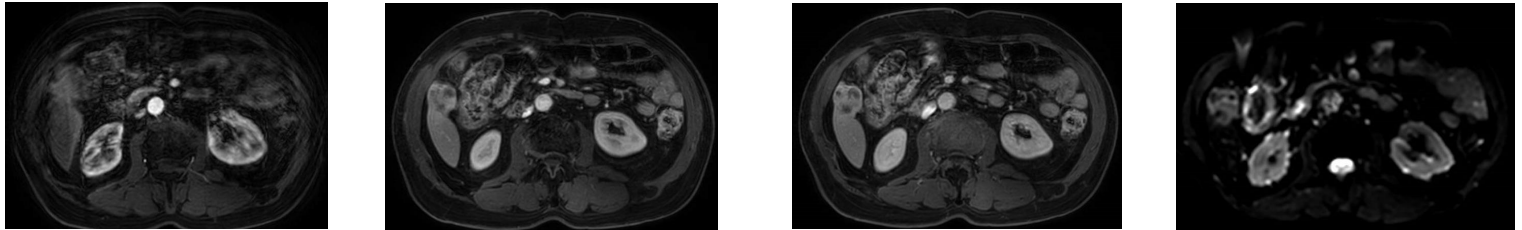

After surgery

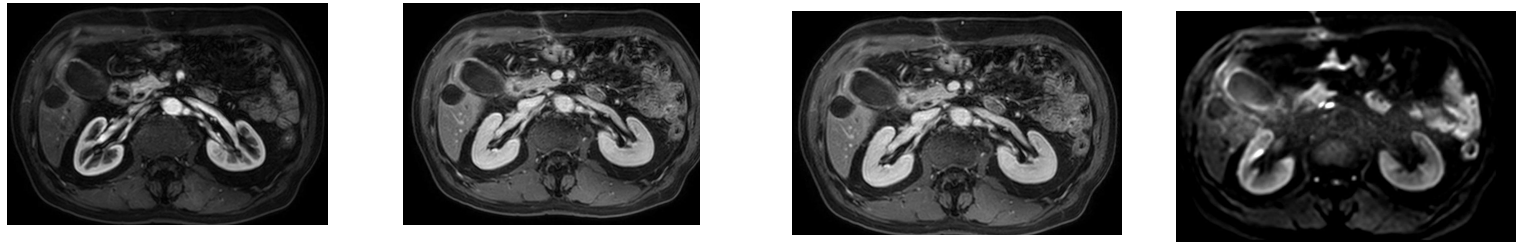

Tumor specimen

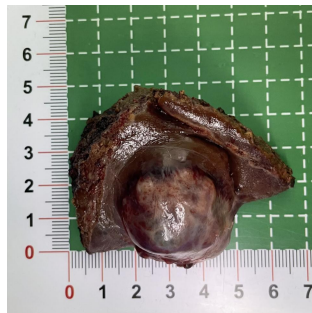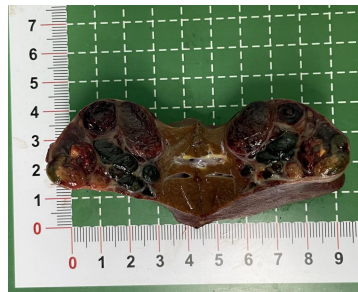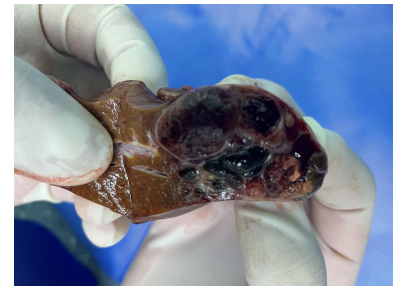

Patient 11

Baseline

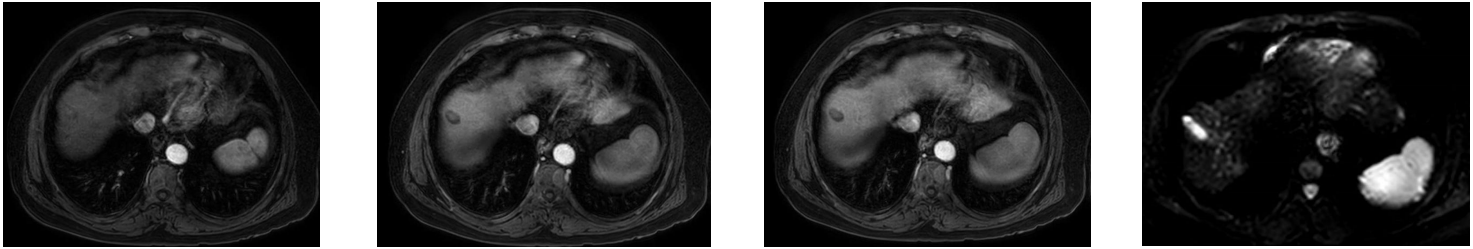

After neoadjuvant

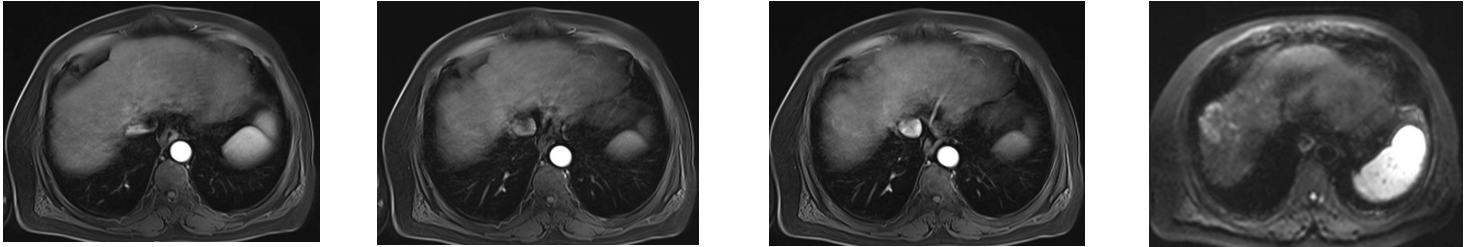

After surgery

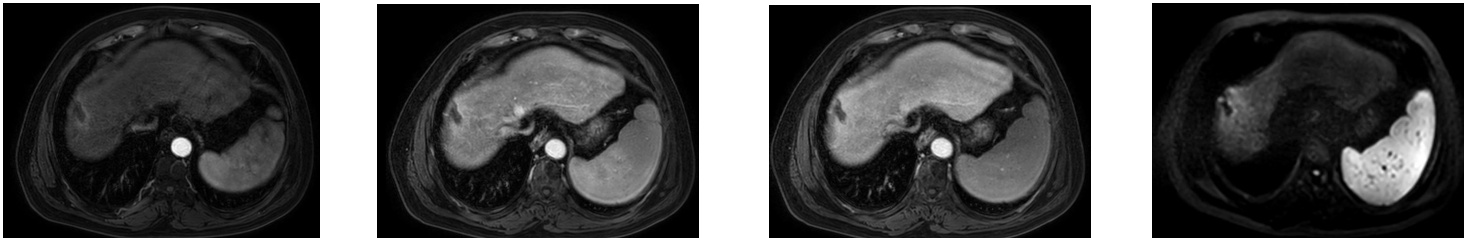

Tumor specimen

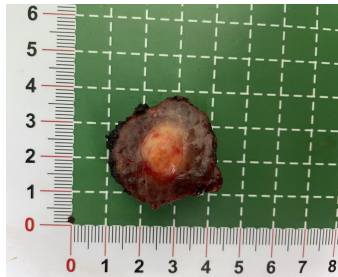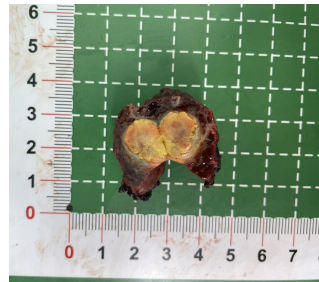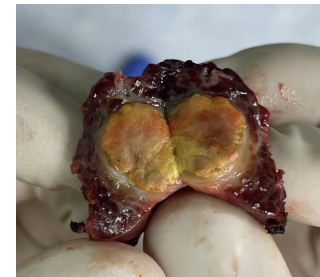

Patient 12

Baseline

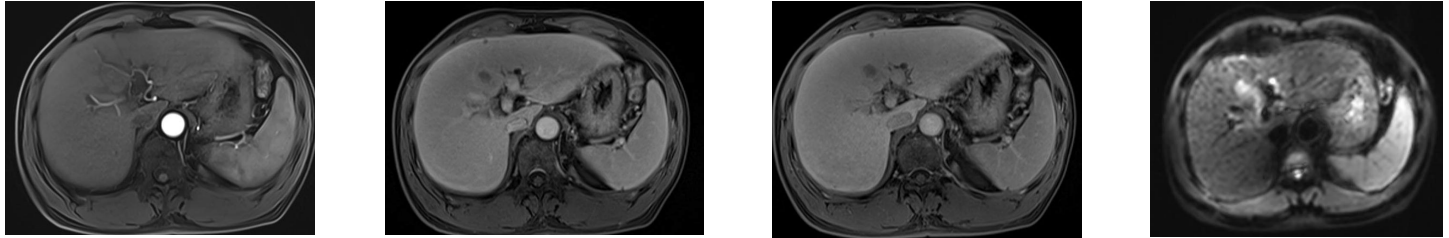

After neoadjuvant

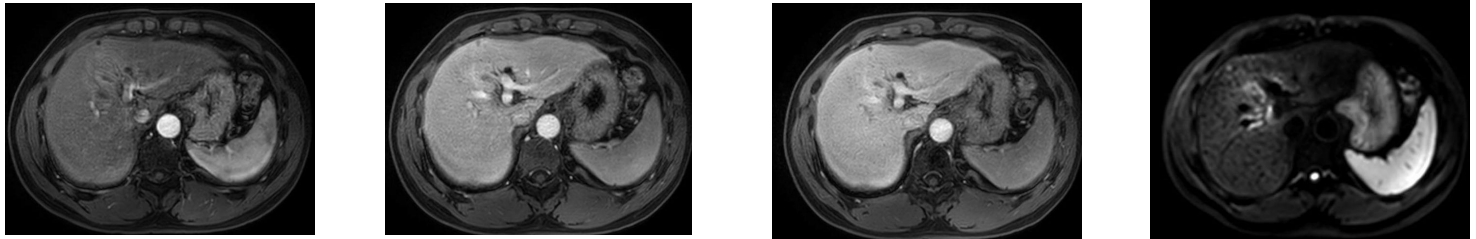

After surgery

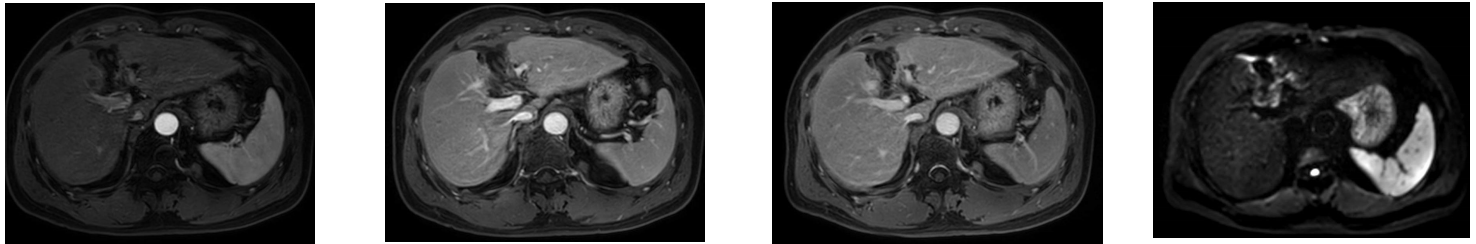

Tumor specimen

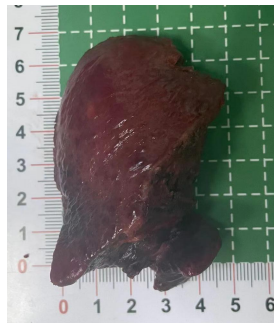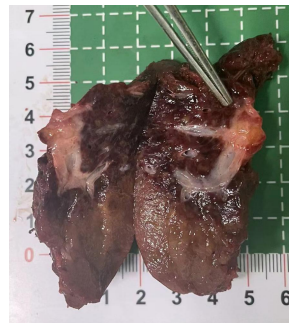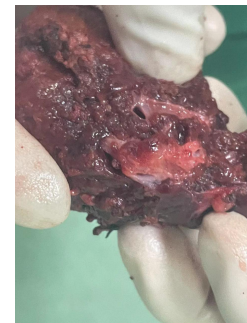



Patient 13

Baseline

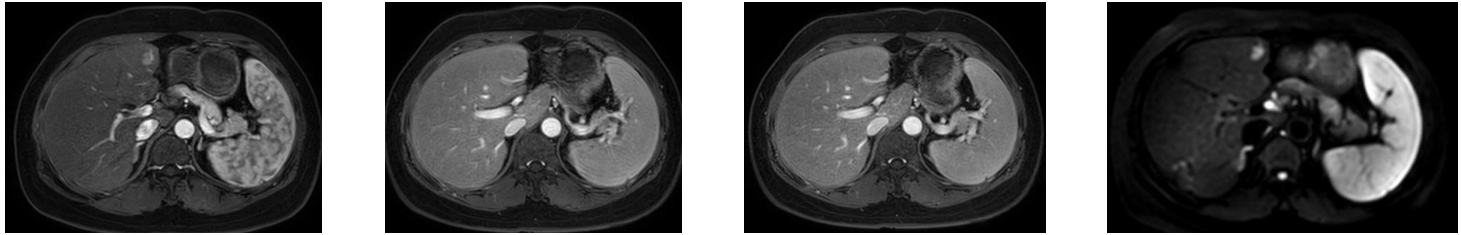

After neoadjuvant

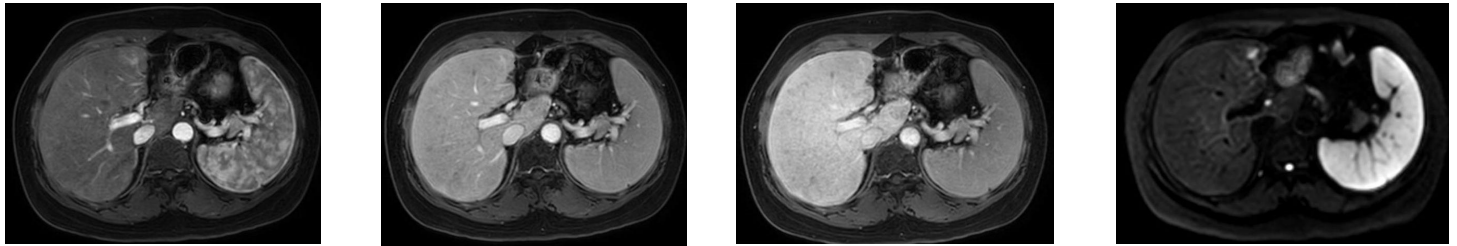

After surgery

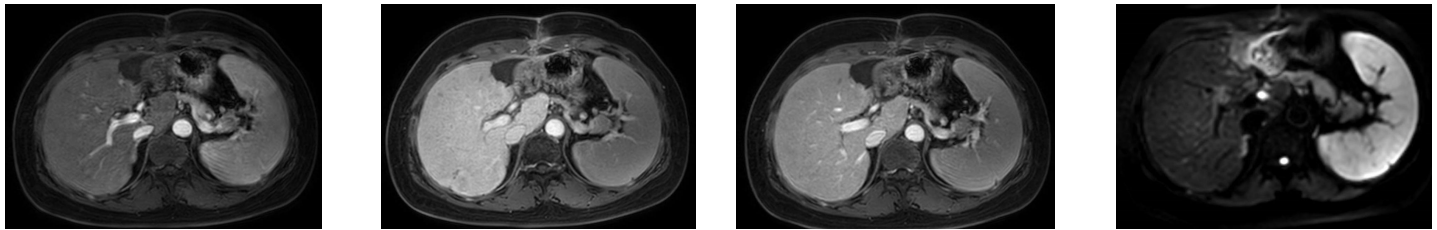

Tumor specimen

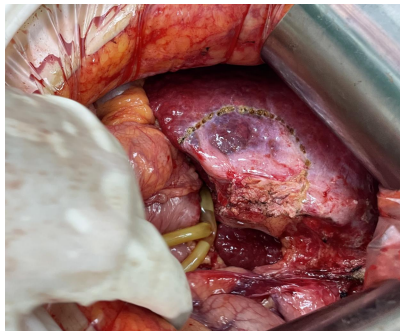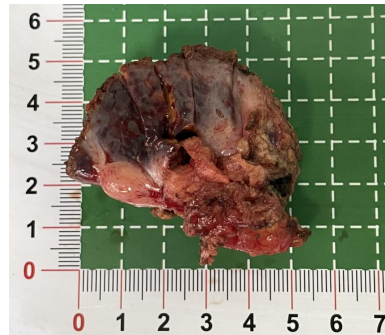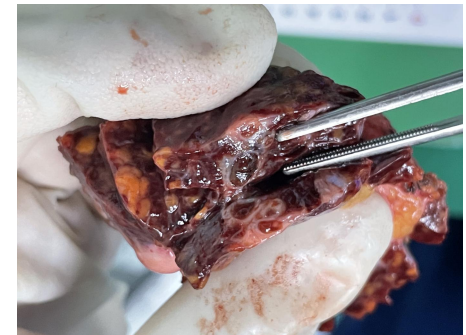

Patient 14

Baseline

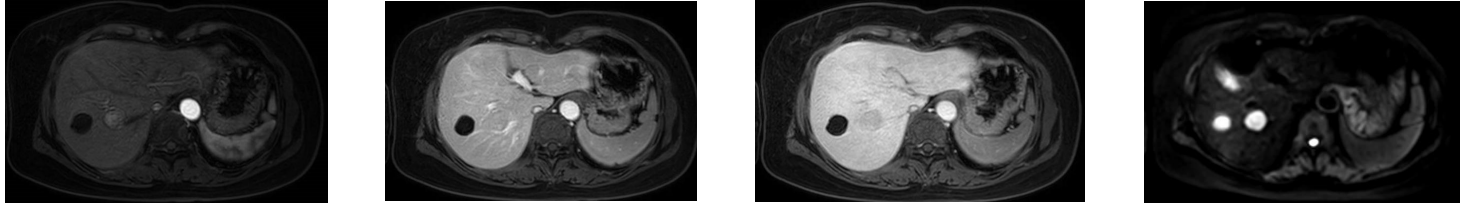

After neoadjuvant

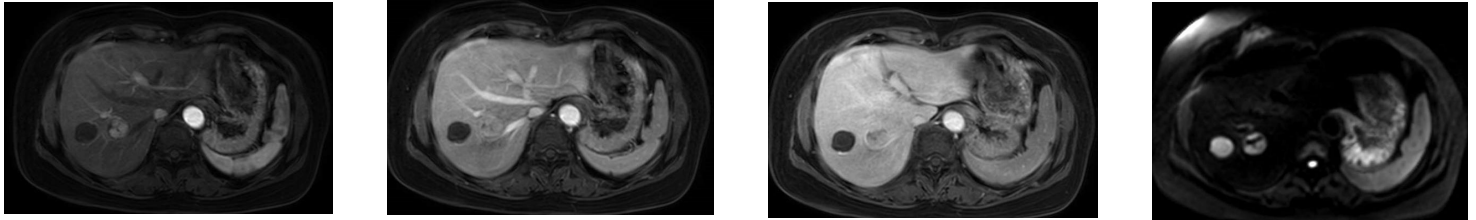

After surgery

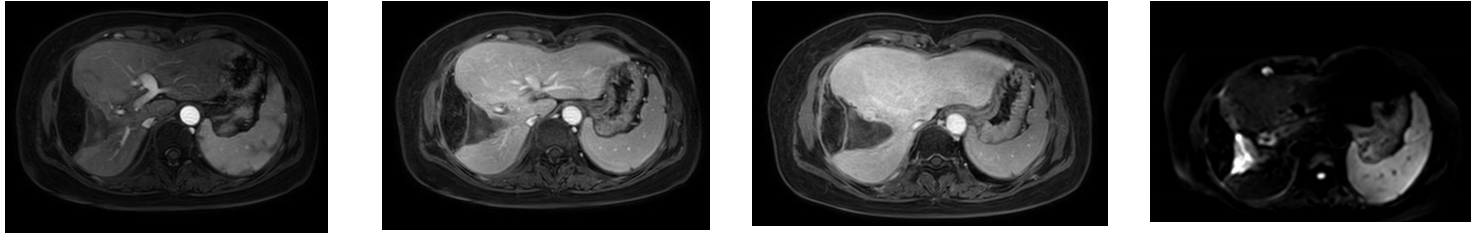

Tumor specimen

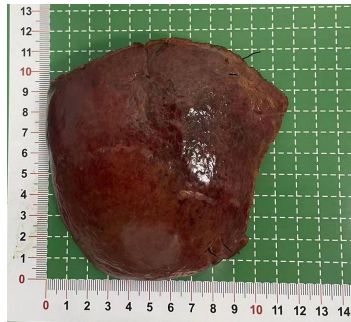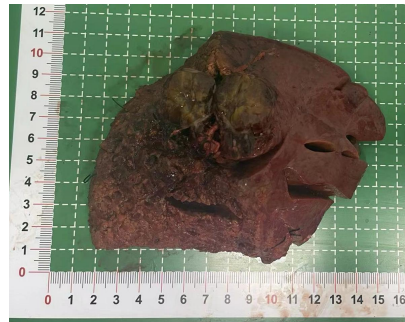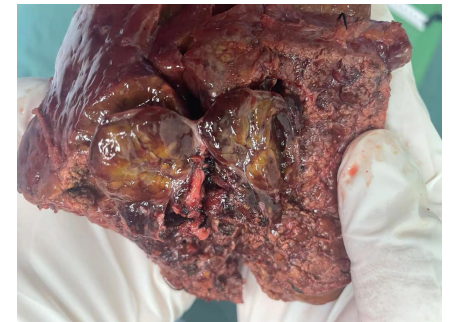



Patient 15

Baseline

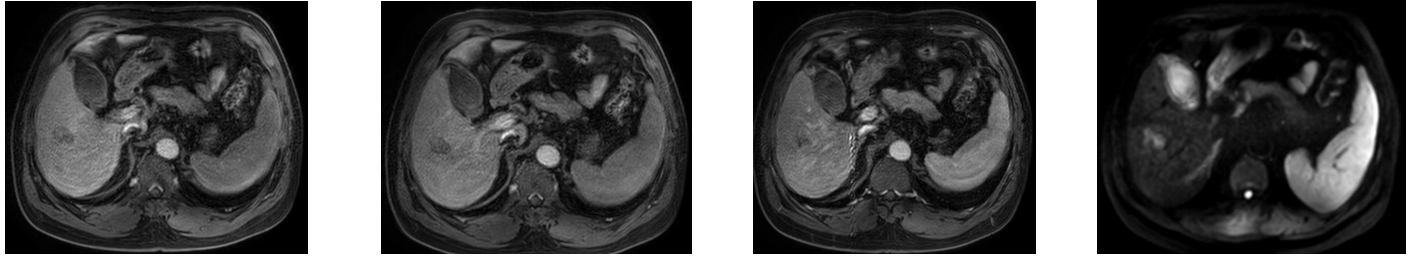

After neoadjuvant

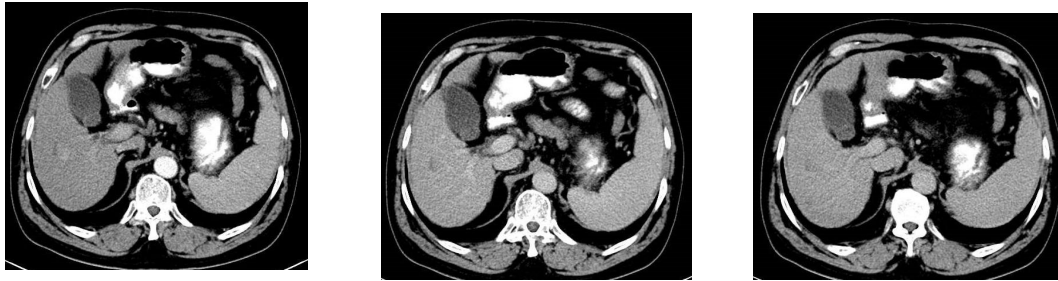

After surgery

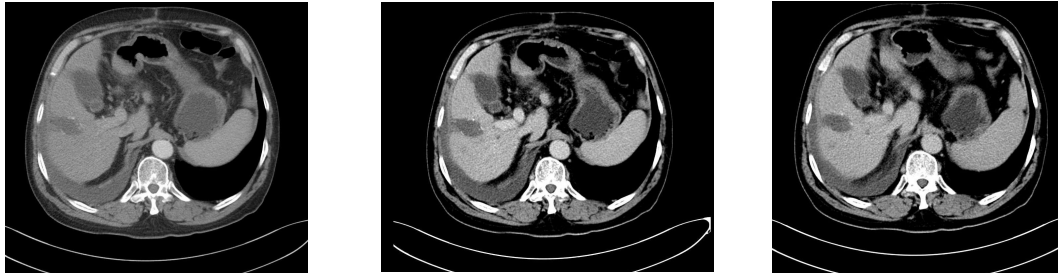

Tumor specimen

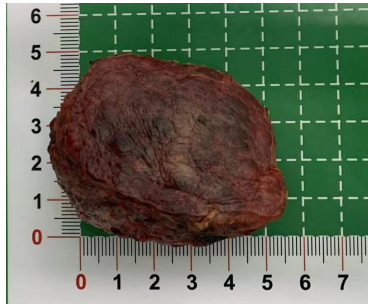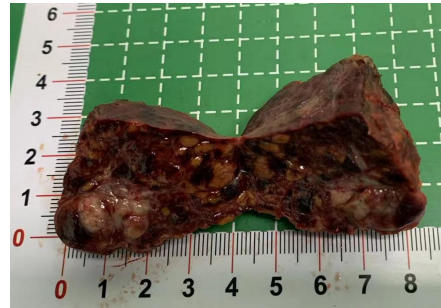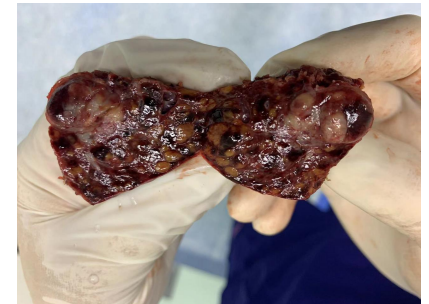



Patient 16

Baseline

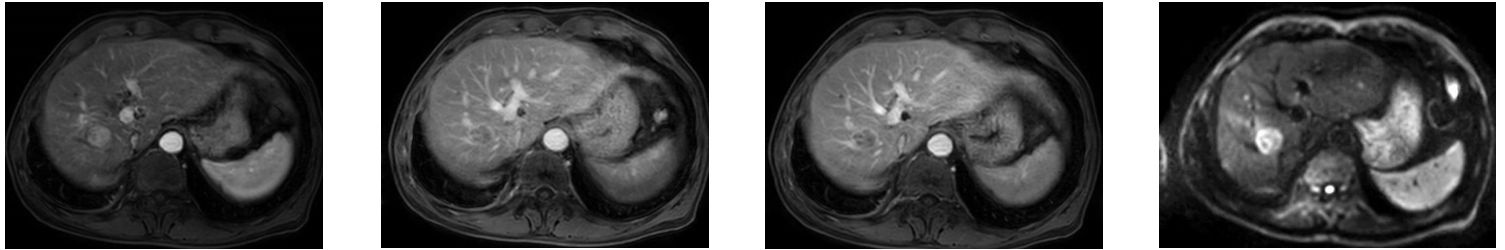

After neoadjuvant

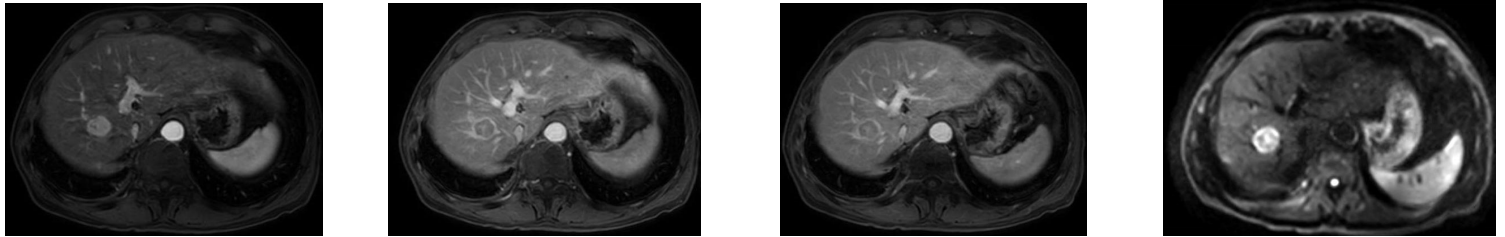

After surgery

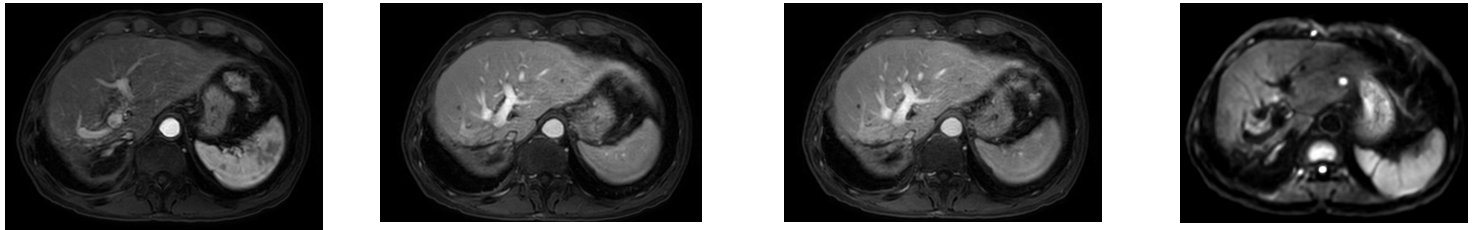

Tumor specimen

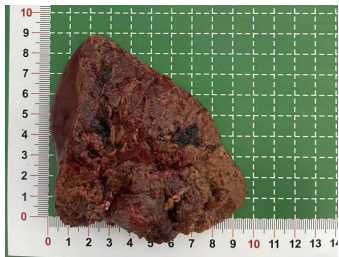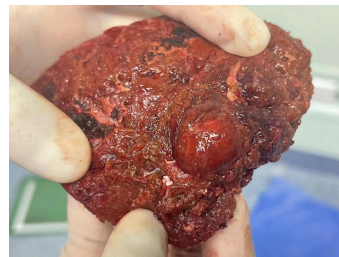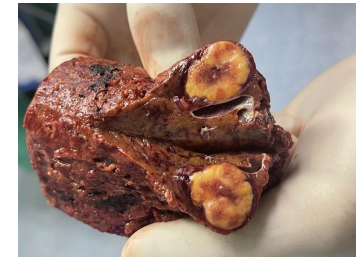

Patient 17

Baseline

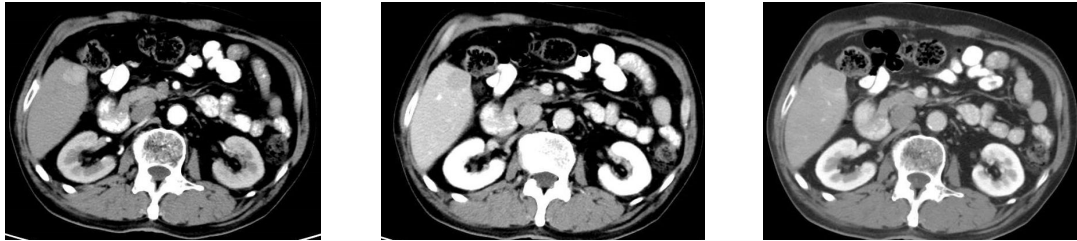

After neoadjuvant

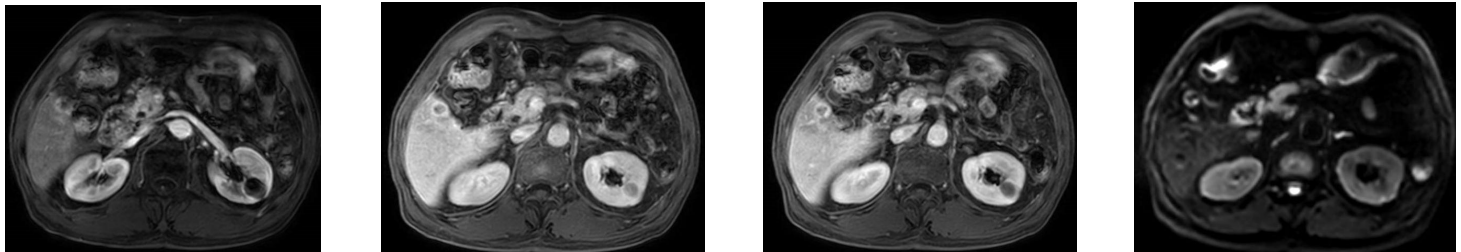

After surgery

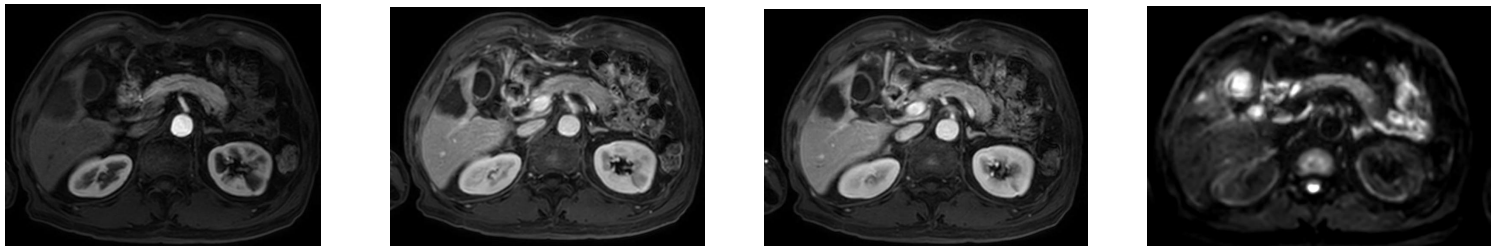

Tumor specimen

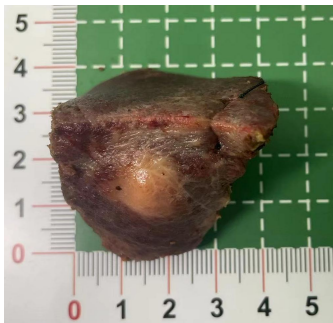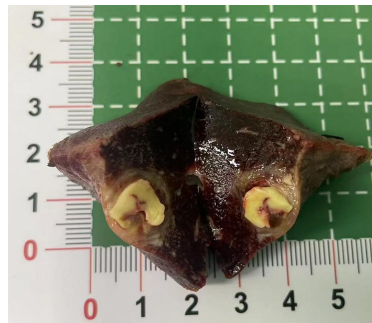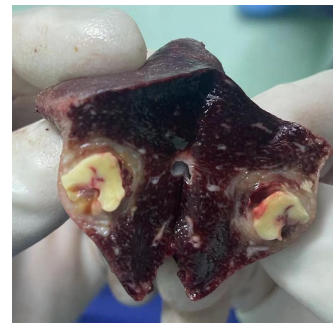

Patient 18

Baseline

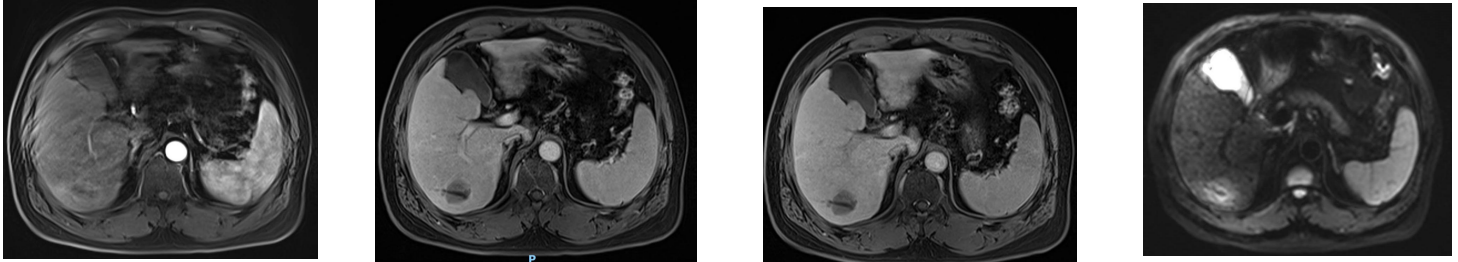

After neoadjuvant

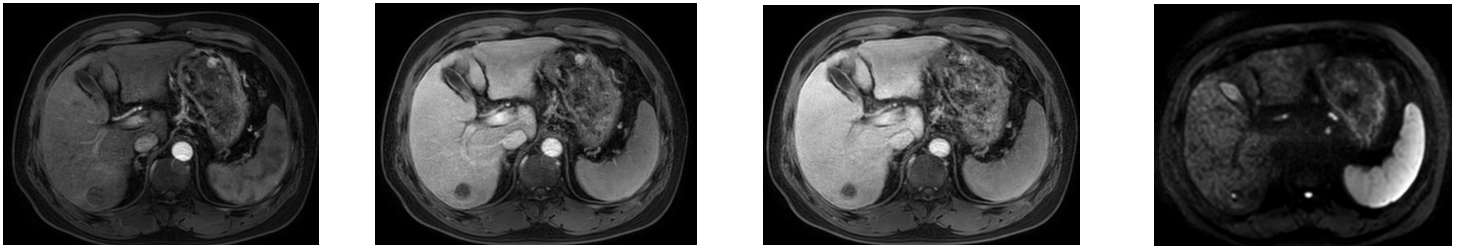

After surgery

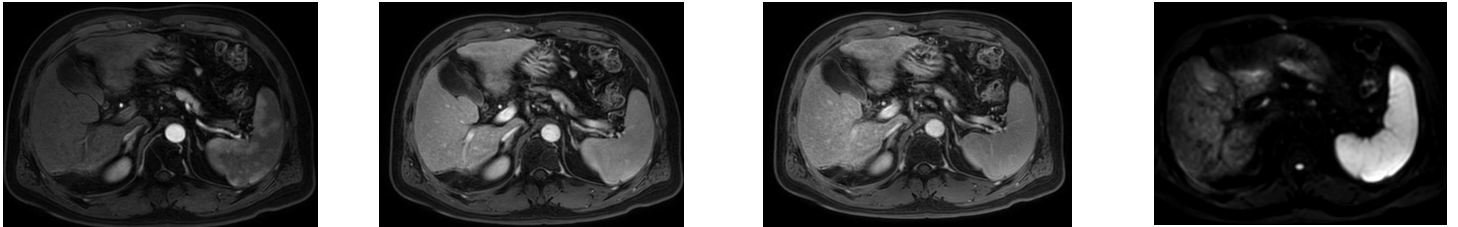

Tumor specimen

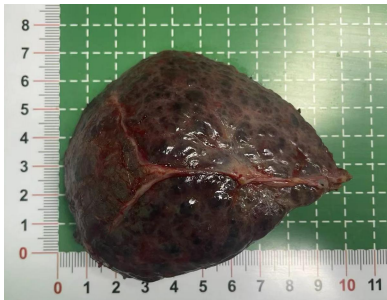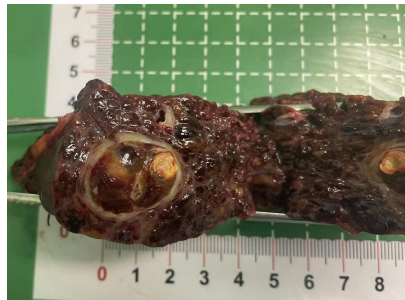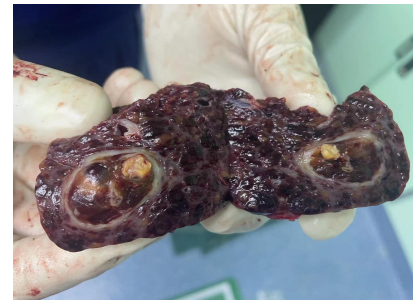



Patient 19

Baseline

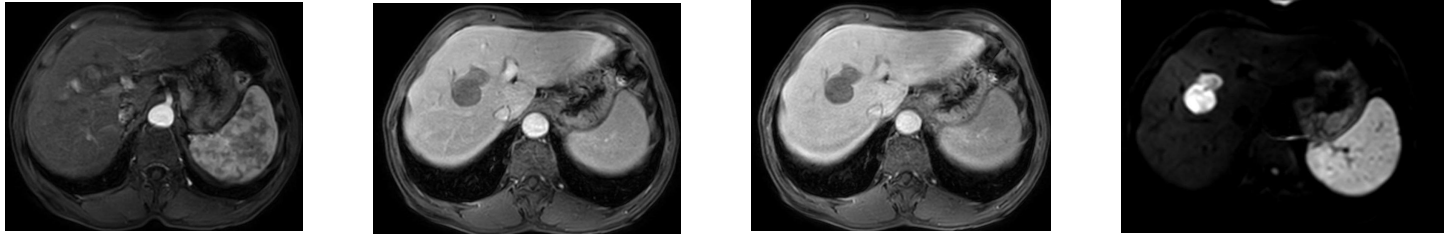

After neoadjuvant

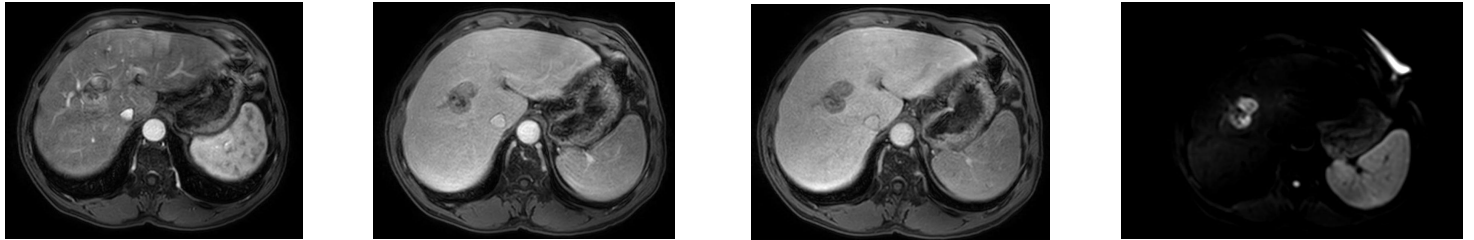

After surgery

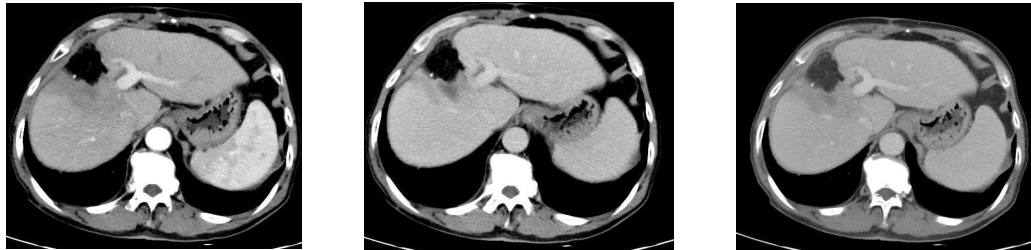

Tumor specimen

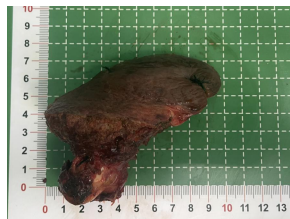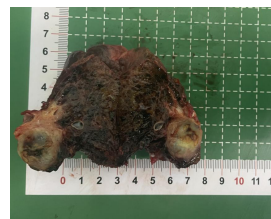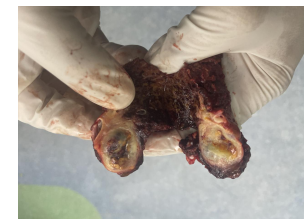

Patient 20

Baseline

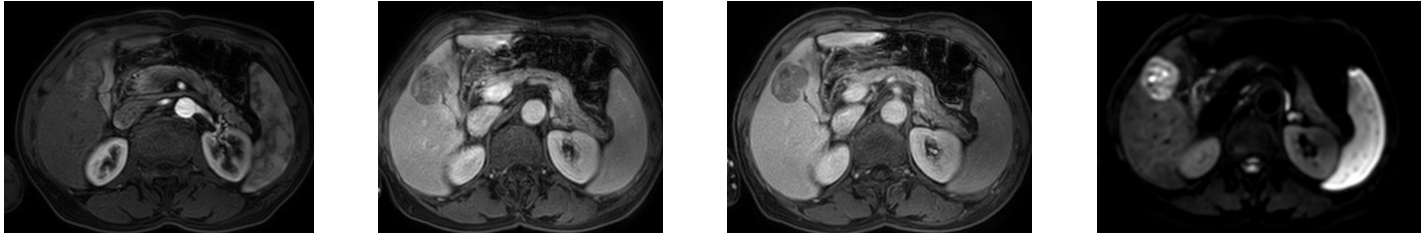

After neoadjuvant

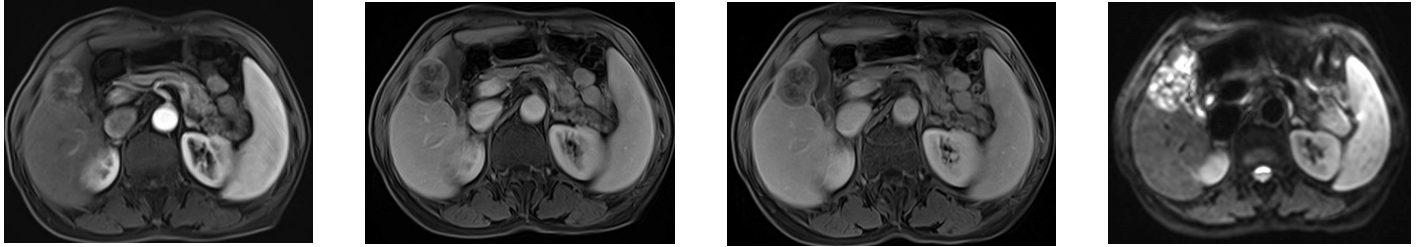

After surgery

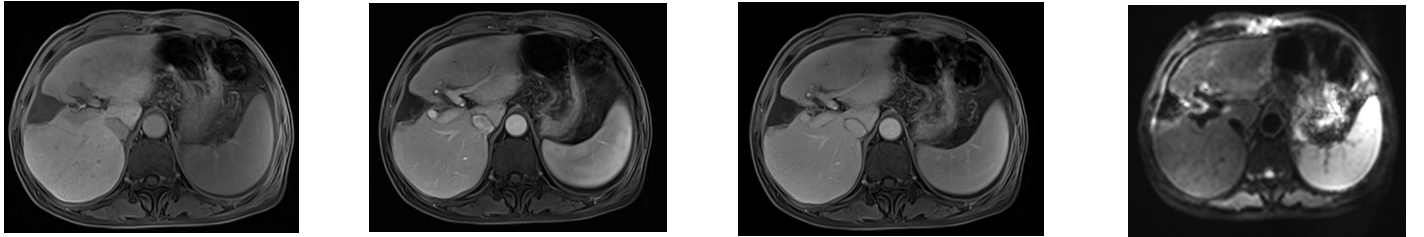

Tumor specimen

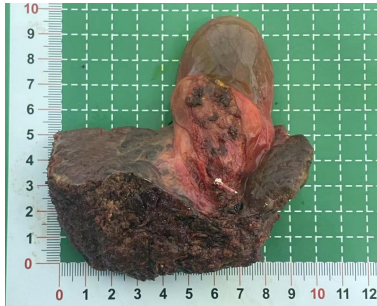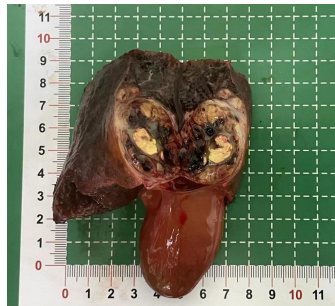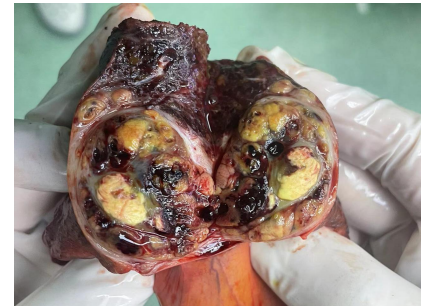

Supplement: Supplementary file 1 [file 43586b1fc62e884d069a3c40.pdf]
