# Supplementary material for: Notable-HCC: A phase Ib trial of neoadjuvant tislelizumab with stereotactic body radiotherapy in patients with early stage resectable hepatocellular carcinoma
Source: Research Square preprint supplement (doi:10.21203/rs.3.rs-3823003/v1), 2024-01-09
Supplement: Supplementary file 1 [file 2749e91e03c5ff3250168ff2.docx]

**Supplemental table 1. Details of** **adverse events of myelosuppression, ALT and AST during neoadjuvant treatment.**

| CTCAE terms |  | | grade | | | | deteriorating grade than baseline | | |
| --- | --- | --- | --- | --- | --- | --- | --- | --- | --- |
| any | 3 | | 4-5 |  | △0 | △1 | △2 | △3 |
| White blood cell decrease | 13(65.0%) | 2(10.0%) | | 0 |  | 8(40.0%) | 9(45.0%) | 3(15.0%) | 0 |
| Lymphocyte count decrease | 18(90.0%) | 3(15.0%) | | 0 |  | 4(20.0%) | 7(35.0%) | 9(45.0%) | 0 |
| Neutrophil count decrease | 8(40.0%) | 3(15.0%) | | 0 |  | 16(80.0%) | 2(10.0%) | 2(10.0%) | 0 |
| Platelet count decrease | 14(70.0%) | 1(5.0%) | | 0 |  | 10(50.0%) | 10(50.0%) | 0 | 0 |
| ALT increase | 5(25.0%) | 1(5.0%) | | 0 |  | 15(75.0%) | 3(15.0%) | 1(5.0%) | 1(5.0%) |
| AST increase | 9(40.0%) | 2(10.0%) | | 0 |  | 11(55.0%) | 6(30.0%) | 1(5.0%) | 2(10.0%) |

ALT, alanine aminotransferase; AST, aspartate aminotransferase.
