# Supplementary material for: Notable-HCC: A phase Ib trial of neoadjuvant tislelizumab with stereotactic body radiotherapy in patients with early stage resectable hepatocellular carcinoma
Source: Research Square preprint supplement (doi:10.21203/rs.3.rs-3823003/v1), 2024-01-09
Supplement: Supplementary file 2 [file 52d3bd2324730aa2800669bf.pdf]

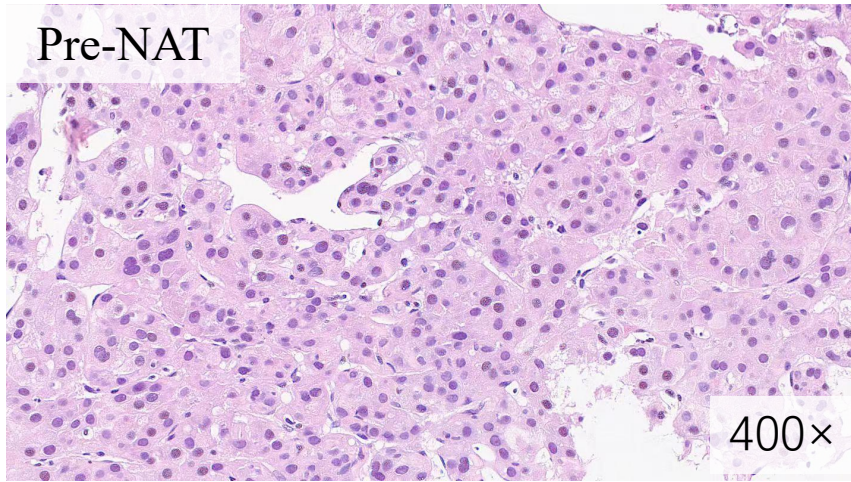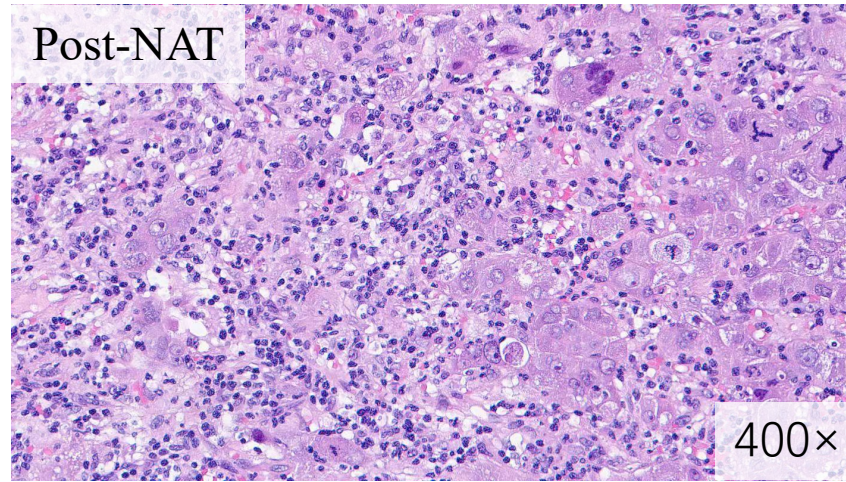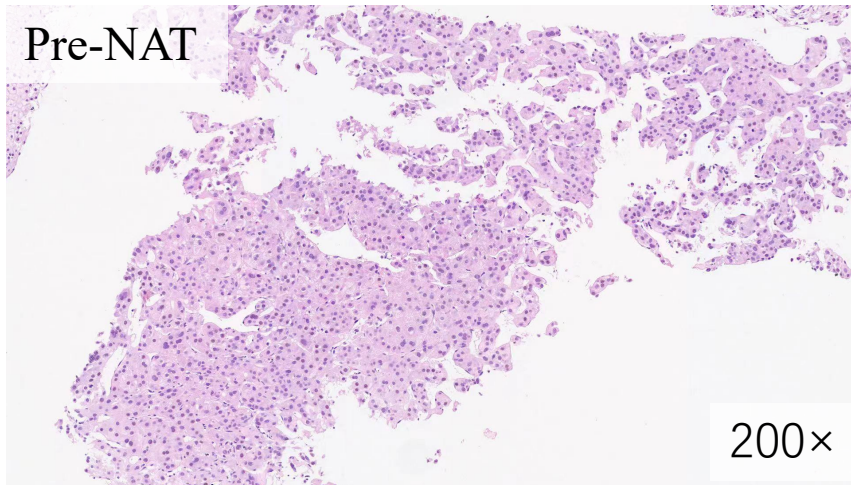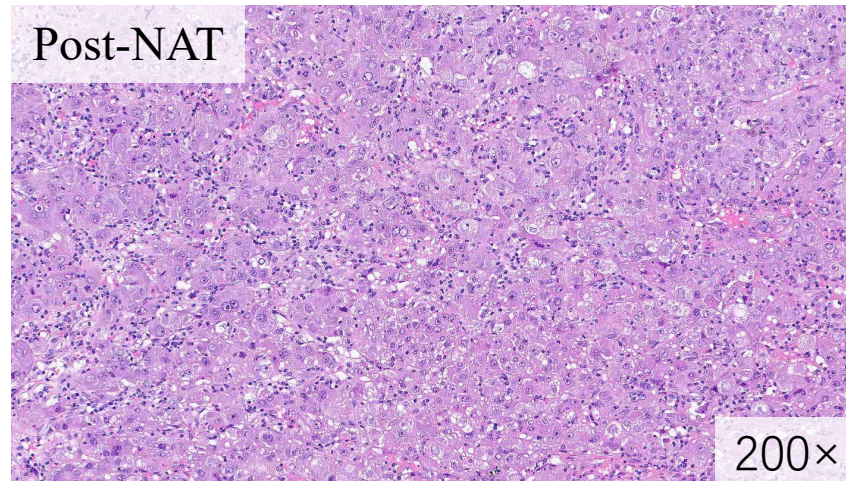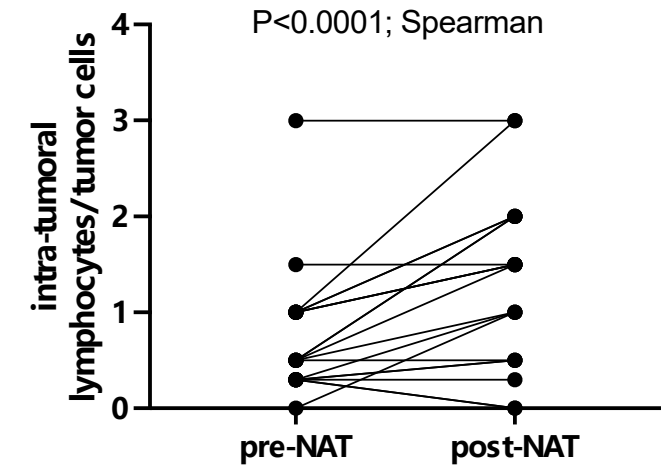

Supplementary Figure 1 Intra-tumoral lymphocyte infiltration in the paired pre- and post- neoadjuvant therapy samples from the same patient
