# Supplementary material for: Notable-HCC: A phase Ib trial of neoadjuvant tislelizumab with stereotactic body radiotherapy in patients with early stage resectable hepatocellular carcinoma
Source: Research Square preprint supplement (doi:10.21203/rs.3.rs-3823003/v1), 2024-01-09
Supplement: Supplementary file 2 [file 4768de9635ecffcc1fd2262a.docx]

**Supplemental table 3. Details of adverse events of myelosuppression, ALT and AST during adjuvant treatment.**

| CTCAE term | grade | | | |  | deteriorating grade than baseline | | | |
| --- | --- | --- | --- | --- | --- | --- | --- | --- | --- |
| any | 3 | 4-5 |  | △0 | | △1 | △2 | △3 |
| White blood cell decrease | 7(41.2%) | 0 | 0 |  | 12(70.6%) | | 4(23.5%) | 1(5.9%) | 0 |
| Lymphocyte count decrease | 13(76.5%) | 3(17.6%) | 0 |  | 6(35.3%) | | 5(29.4%) | 3(17.6%) | 2(11.8%) |
| Neutrophil count decrease | 4(23.5%) | 0 | 0 |  | 15(88.2%) | | 1(5.9%) | 0 | 0 |
| Platelet count decrease | 12(70.6%) | 1(5.9%) | 0 |  | 10(58.8%) | | 6(35.3%) | 1(5.9%) | 0 |
| ALT increase | 2(11.1%) | 0 | 0 |  | 15(88.2%) | | 2(11.8%) | 0 | 0 |
| AST increase | 5(27.8%) | 0 | 0 |  | 12(70.6%) | | 5(29.4%) | 0 | 0 |

ALT, alanine aminotransferase; AST, aspartate aminotransferase.
