# Supplementary material for: Notable-HCC: A phase Ib trial of neoadjuvant tislelizumab with stereotactic body radiotherapy in patients with early stage resectable hepatocellular carcinoma
Source: Research Square preprint supplement (doi:10.21203/rs.3.rs-3823003/v1), 2024-01-09
Supplement: Supplementary file 4 [file 53f935118e0e79f9109cfaf2.docx]

Supplementary table 4

Baseline myelosuppression, ALT and AST grades and the dynamic shifts of deteriorating grades during adjuvant therapy

|  |  |  | | **Baseline CTCAE Toxicity Grade** | | | | |
| --- | --- | --- | --- | --- | --- | --- | --- | --- |
|  | **Post-baseline Worst Grade** | | | **0** | **1** | **2** | **3** | **4** |
| White blood cell decrease | Max | | **0** | 10 |  |  |  |  |
|  | | **1** | 3 |  |  |  |  |
|  | | **2** | 1 | 1 | 2 |  |  |
|  | | **3** |  |  |  |  |  |
|  | | **4** |  |  |  |  |  |
|  | |  |  |  |  | **Total** | **17** |
| EOT | | **0** | 13 |  |  |  |  |
|  | | **1** | 1 |  | 1 |  |  |
|  | | **2** |  | 1 | 1 |  |  |
|  | | **3** |  |  |  |  |  |
|  | | **4** |  |  |  |  |  |
|  | |  |  |  |  | **Total** | **17** |
| Lymphocyte count decrease | Max | | **0** | 3 | 1 |  |  |  |
|  | | **1** | 5 | 1 |  |  |  |
|  | | **2** | 3 |  | 1 |  |  |
|  | | **3** | 2 |  |  | 1 |  |
|  | | **4** |  |  |  |  |  |
|  | |  |  |  |  | **Total** | **17** |
| EOT | | **0** | 7 | 1 |  |  |  |
|  | | **1** | 4 | 1 |  |  |  |
|  | | **2** | 1 |  | 1 |  |  |
|  | | **3** | 1 |  |  | 1 |  |
|  | | **4** |  |  |  |  |  |
|  | |  |  |  |  | **Total** | **17** |
| Neutrophil count decrease | Max | | **0** | 13 |  |  |  |  |
|  | | **1** |  |  |  |  |  |
|  | | **2** |  | 1 | 2 | 1 |  |
|  | | **3** |  |  |  |  |  |
|  | | **4** |  |  |  |  |  |
|  | |  |  |  |  | **Total** | **17** |
| EOT | | **0** | 13 | 1 |  | 1 |  |
|  | | **1** |  |  | 2 |  |  |
|  | | **2** |  |  |  |  |  |
|  | | **3** |  |  |  |  |  |
|  | | **4** |  |  |  |  |  |
|  | |  |  |  |  | **Total** | **17** |
| Platelet count decrease | Max | | **0** | 5 |  |  |  |  |
|  | | **1** | 4 | 4 |  |  |  |
|  | | **2** | 1 | 1 | 1 |  |  |
|  | | **3** |  |  | 1 |  |  |
|  | | **4** |  |  |  |  |  |
|  | |  |  |  |  | **Total** | **17** |
| EOT | | **0** | 6 | 1 |  |  |  |
|  | | **1** | 3 | 4 |  |  |  |
|  | | **2** | 1 |  | 1 |  |  |
|  | | **3** |  |  | 1 |  |  |
|  | | **4** |  |  |  |  |  |
|  | |  |  |  |  | **Total** | **17** |
| ALT increase | Max | | **0** | 15 |  |  |  |  |
|  | | **1** | 2 |  |  |  |  |
|  | | **2** |  |  |  |  |  |
|  | | **3** |  |  |  |  |  |
|  | | **4** |  |  |  |  |  |
|  | |  |  |  |  | **Total** | **17** |
| EOT | | **0** | 16 |  |  |  |  |
|  | | **1** | 1 |  |  |  |  |
|  | | **2** |  |  |  |  |  |
|  | | **3** |  |  |  |  |  |
|  | | **4** |  |  |  |  |  |
|  | |  |  |  |  | **Total** | **17** |
| AST increase | Max | | **0** | 12 |  |  |  |  |
|  | | **1** | 5 |  |  |  |  |
|  | | **2** |  |  |  |  |  |
|  | | **3** |  |  |  |  |  |
|  | | **4** |  |  |  |  |  |
|  | |  |  |  |  | **Total** | **17** |
| EOT | | **0** | 13 |  |  |  |  |
|  | | **1** | 4 |  |  |  |  |
|  | | **2** |  |  |  |  |  |
|  | | **3** |  |  |  |  |  |
|  | | **4** |  |  |  |  |  |
|  | |  |  |  |  | **Total** | **17** |

ALT, alanine aminotransferase; AST, aspartate aminotransferase; Max, maximal grade during treatment; EOT, grade at the end of treatment.
